# Supplementary material
Source: PubMed Central journal article supplement (PMC3021125)
Supplement: NIHMS56225-supplement-1.pdf [file NIHMS56225-supplement-1.pdf]

Lithium Hexamethyldisilazide-Mediated Enolizations: Influence of Triethylamine on  
*E/Z* Selectivities and Enolate Reactivities

Peter F. Godenschwager and David B. Collum\*  
Department of Chemistry and Chemical Biology  
Baker Laboratory, Cornell University,  
Ithaca, New York 14853-1301

**Supporting Information**

|             |                                                                                                                                          |           |
|-------------|------------------------------------------------------------------------------------------------------------------------------------------|-----------|
| <b>I</b>    | Plot of $k_{\text{obsd}}$ vs $[\text{Et}_3\text{N}]$ in toluene for the enolization of <b>5</b> - $d_3$ by LiHMDS.                       | <b>S3</b> |
| <b>II</b>   | Table of data for plot in section <b>I</b> .                                                                                             | <b>S3</b> |
| <b>III</b>  | Plot of $k_{\text{obsd}}$ vs $[\text{LiHMDS}]$ for the enolization of <b>5</b> - $d_3$ in $\text{Et}_3\text{N}$ /toluene.                | <b>S4</b> |
| <b>IV</b>   | Table of data for plot in section <b>III</b> .                                                                                           | <b>S4</b> |
| <b>V</b>    | Plot of $k_{\text{obsd}}$ vs $[\text{Et}_3\text{N}]$ for the enolization of isopropyl propionate by LiHMDS in toluene.                   | <b>S5</b> |
| <b>VI</b>   | Table of data for plot in section <b>V</b> .                                                                                             | <b>S5</b> |
| <b>VII</b>  | Plot of $k_{\text{obsd}}$ vs $[\text{LiHMDS}]$ for the enolization of isopropyl propionate in $\text{Et}_3\text{N}$ /toluene.            | <b>S6</b> |
| <b>VIII</b> | Table of data for plot in section <b>VII</b> .                                                                                           | <b>S6</b> |
| <b>IX</b>   | Plot of <i>E/Z</i> selectivity for the enolization of <b>5</b> by LiHMDS in $\text{Et}_3\text{N}$ /toluene.                              | <b>S7</b> |
| <b>X</b>    | Table of data for the plot in section <b>IX</b> .                                                                                        | <b>S7</b> |
| <b>XI</b>   | Plot of <i>E/Z</i> selectivity vs $[\text{THF}]$ for the enolization of <b>5</b> by LiHMDS in toluene.                                   | <b>S8</b> |
| <b>XII</b>  | Table of data for the plot in section <b>XI</b> .                                                                                        | <b>S8</b> |
| <b>XIII</b> | Plot of <i>E/Z</i> selectivity vs [cyclohexyl ethyl ketone] for the enolization of <b>5</b> by LiHMDS in $\text{Et}_3\text{N}$ /toluene. | <b>S9</b> |
| <b>XIV</b>  | Table of data for the plot in section <b>XIII</b> .                                                                                      | <b>S9</b> |

|               |                                                                                                                                                                              |            |
|---------------|------------------------------------------------------------------------------------------------------------------------------------------------------------------------------|------------|
| <b>XV</b>     | $^6\text{Li}$ NMR spectra recorded on [ $^6\text{Li}, ^{15}\text{N}$ ]LiHMDS in $\text{Et}_3\text{N}$ /toluene showing the enolization of <b>5</b> .                         | <b>S10</b> |
| <b>XVI</b>    | <i>E/Z</i> selectivities for the enolization of <b>5</b> by LiHMDS in the presence of trialkyl amines in toluene cosolvent.                                                  | <b>S11</b> |
| <b>XVII</b>   | <i>E/Z</i> selectivities for the enolization of <b>5</b> by LiHMDS in the presence of ethereal ligands in toluene cosolvent.                                                 | <b>S12</b> |
| <b>XVIII</b>  | <i>E/Z</i> selectivities for the enolization of <b>5</b> by LiHMDS in the presence of polydentate ligands in toluene cosolvent.                                              | <b>S13</b> |
| <b>XIX</b>    | <i>E/Z</i> selectivities for the enolization of methyl propionate by various lithium amides.                                                                                 | <b>S14</b> |
| <b>XX.</b>    | <i>E/Z</i> selectivities for the enolization of various ketones by LiHMDS in $\text{Et}_3\text{N}$ /toluene.                                                                 | <b>S15</b> |
| <b>XXI.</b>   | Stereoselectivities of aldol reaction of ketone enolates, generated by LiHMDS in $\text{Et}_3\text{N}$ /toluene, with isobutyraldehyde.                                      | <b>S16</b> |
| <b>XXII.</b>  | Stereoselectivities of aldol reaction of 2-methyl-3-pentanone enolate, generated by LiHMDS, in various enolization and aldol solvent systems with isobutyraldehyde.          | <b>S17</b> |
| <b>XXIII.</b> | Stereoselectivities of aldol reaction of 3-pentanone enolate, generated by LiHMDS in $\text{Et}_3\text{N}$ /toluene, in various aldol solvent systems with isobutyraldehyde. | <b>S18</b> |

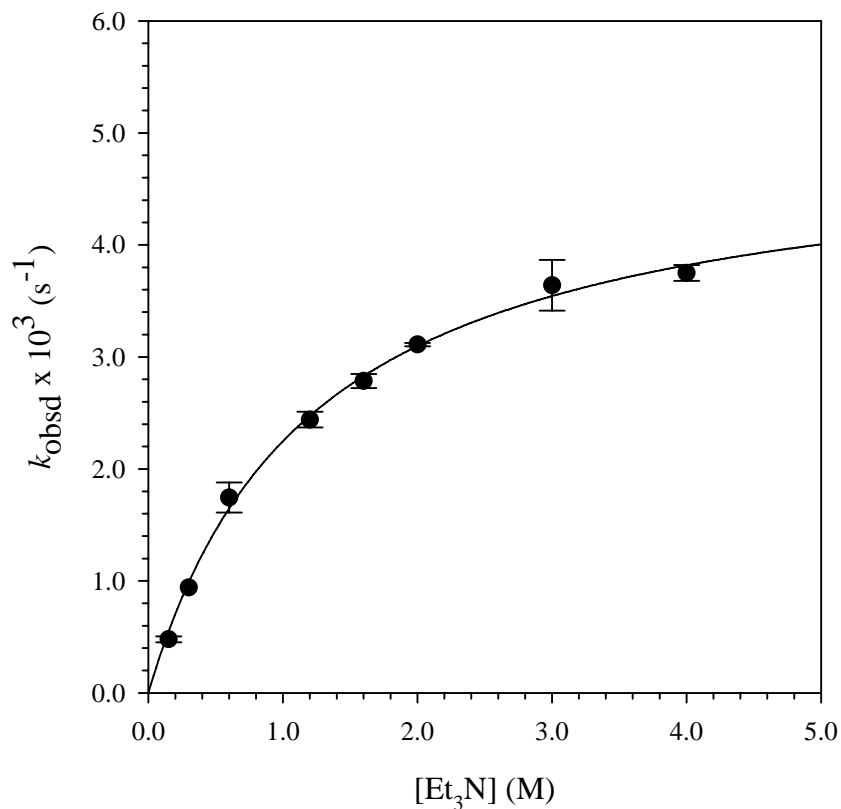

**I.** Plot of  $k_{\text{obsd}}$  vs  $[\text{Et}_3\text{N}]$  in toluene for the enolization of **5-d<sub>3</sub>** (0.005 M) by LiHMDS (0.10 M) at -78 °C. The line depicts the unweighted least-squares fit to  $k_{\text{obsd}} = a[\text{Et}_3\text{N}]/(1 + b[\text{Et}_3\text{N}])$  ( $a = 4.0 \pm 0.1$ ,  $b = 8.2 \pm 0.6 \times 10^{-1}$ ).

**II.** Table of data for plot in section I.

| $[\text{Et}_3\text{N}]$ (M) | $k_{\text{obsd}1}$ (s <sup>-1</sup> ) | $k_{\text{obsd}2}$ (s <sup>-1</sup> ) | $k_{\text{obsd}}(\text{avg})$ (s <sup>-1</sup> ) |
|-----------------------------|---------------------------------------|---------------------------------------|--------------------------------------------------|
| 0.15                        | $4.97 \pm 0.05\text{E-}4$             | $4.60 \pm 0.06\text{E-}4$             | $4.7 \pm 0.2\text{E-}4$                          |
| 0.30                        | $9.4 \pm 0.1\text{E-}4$               | $9.4 \pm 0.1\text{E-}4$               | $9.4 \pm 0.0\text{E-}4$                          |
| 0.60                        | $1.84 \pm 0.03\text{E-}3$             | $1.65 \pm 0.03\text{E-}3$             | $1.7 \pm 0.1\text{E-}3$                          |
| 1.2                         | $2.49 \pm 0.08\text{E-}3$             | $2.39 \pm 0.04\text{E-}3$             | $2.44 \pm 0.07\text{E-}3$                        |
| 1.6                         | $2.83 \pm 0.06\text{E-}3$             | $2.74 \pm 0.07\text{E-}3$             | $2.78 \pm 0.06\text{E-}3$                        |
| 2.0                         | $3.10 \pm 0.05\text{E-}3$             | $3.12 \pm 0.09\text{E-}3$             | $3.11 \pm 0.01\text{E-}3$                        |
| 3.0                         | $3.48 \pm 0.05\text{E-}3$             | $3.8 \pm 0.1\text{E-}3$               | $3.6 \pm 0.2\text{E-}3$                          |
| 4.0                         | $3.8 \pm 0.1\text{E-}3$               | $3.7 \pm 0.1\text{E-}3$               | $3.75 \pm 0.07\text{E-}3$                        |

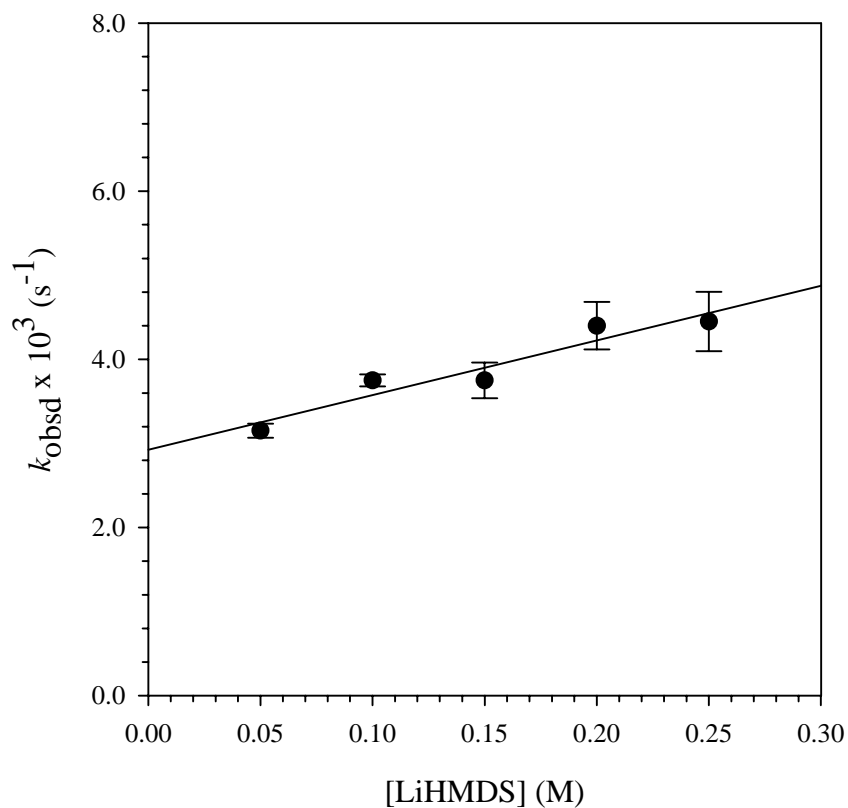

**III.** Plot of  $k_{\text{obsd}}$  vs [LiHMDS] for the enolization of **5- $d_3$**  in 4.0 M  $\text{Et}_3\text{N}$ /toluene at -78 °C. The curve depicts the unweighted least-squares fit to  $k_{\text{obsd}} = a[\text{LiHMDS}] + b$  ( $a = 5 \pm 1 \times 10^{-3}$ ,  $b = 3.0 \pm 0.1 \times 10^{-3}$ ).

**IV.** Table of data for plot in section **III**.

| [LiHMDS] (M) | $k_{\text{obsd}1} \text{ (s}^{-1}\text{)}$ | $k_{\text{obsd}2} \text{ (s}^{-1}\text{)}$ | $k_{\text{obsd}}(\text{avg}) \text{ (s}^{-1}\text{)}$ |
|--------------|--------------------------------------------|--------------------------------------------|-------------------------------------------------------|
| 0.05         | $3.21 \pm 0.06\text{E-}3$                  | $3.09 \pm 0.07\text{E-}3$                  | $3.15 \pm 0.08\text{E-}3$                             |
| 0.10         | $3.8 \pm 0.1\text{E-}3$                    | $3.7 \pm 0.1\text{E-}3$                    | $3.75 \pm 0.07\text{E-}3$                             |
| 0.15         | $3.6 \pm 0.1\text{E-}3$                    | $3.9 \pm 0.1\text{E-}3$                    | $3.7 \pm 0.2\text{E-}3$                               |
| 0.20         | $4.2 \pm 0.1\text{E-}3$                    | $4.6 \pm 0.1\text{E-}3$                    | $4.4 \pm 0.2\text{E-}3$                               |
| 0.25         | $4.2 \pm 0.1\text{E-}3$                    | $4.7 \pm 0.1\text{E-}3$                    | $4.4 \pm 0.3\text{E-}3$                               |

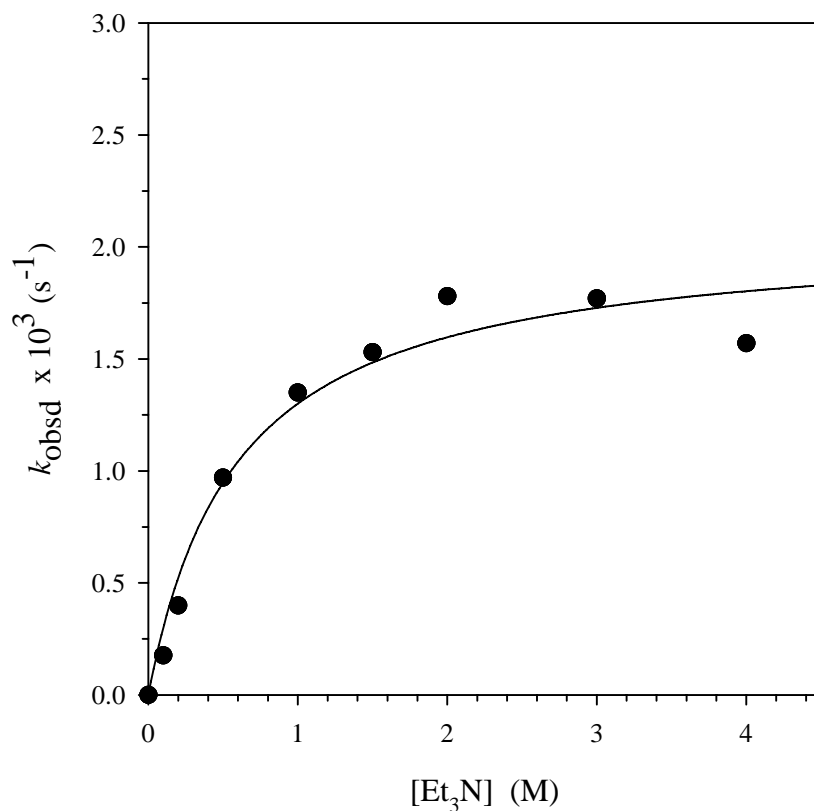

**V.** Plot of  $k_{\text{obsd}}$  vs  $[\text{Et}_3\text{N}]$  for the enolization of isopropyl propionate by LiHMDS (0.10 M) in toluene at  $-78\text{ }^\circ\text{C}$ . The curve depicts the unweighted least-squares fit to  $k_{\text{obsd}} = a[\text{Et}_3\text{N}]/(1 + b[\text{Et}_3\text{N}])$  ( $a = 3.5 \pm 0.6 \times 10^{-3}$ ,  $b = 1.6 \pm 0.4$ ).

**VI.** Table of data for plot in section V.

| $[\text{Et}_3\text{N}]$ (M) | $k_{\text{obsd}}$ ( $\text{s}^{-1}$ ) |
|-----------------------------|---------------------------------------|
| 0.10                        | $1.76 \pm 0.01\text{E-}4$             |
| 0.20                        | $3.99 \pm 0.02\text{E-}4$             |
| 0.50                        | $9.71 \pm 0.09\text{E-}4$             |
| 1.0                         | $1.35 \pm 0.01\text{E-}3$             |
| 1.5                         | $1.55 \pm 0.02\text{E-}3$             |
| 2.0                         | $1.78 \pm 0.01\text{E-}3$             |
| 3.0                         | $1.77 \pm 0.03\text{E-}3$             |
| 4.0                         | $1.57 \pm 0.01\text{E-}3$             |

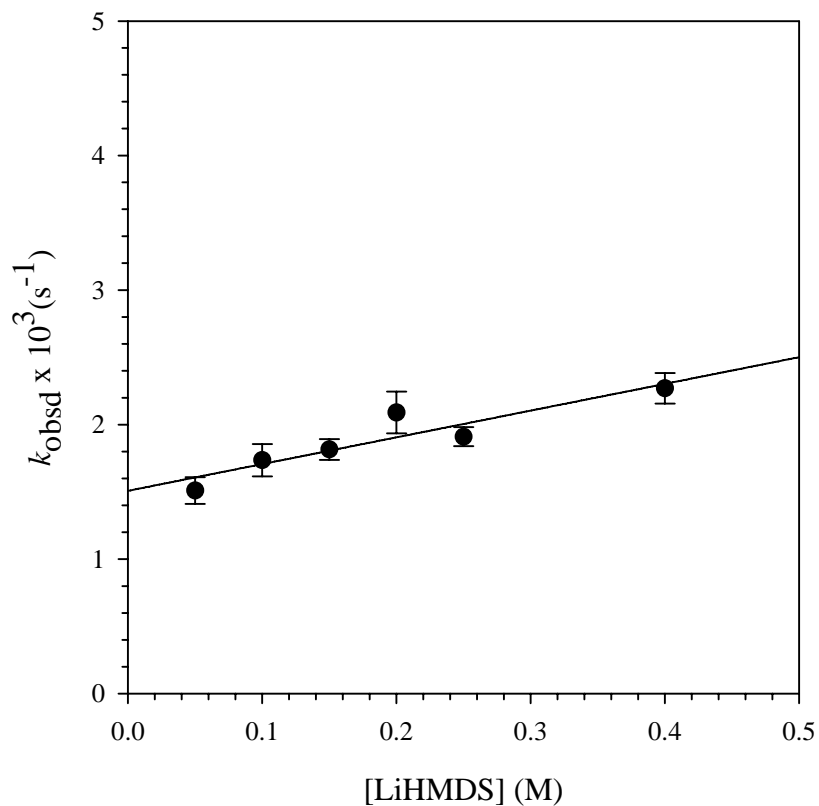

**VII.** Plot of  $k_{\text{obsd}}$  vs [LiHMDS] for the enolization of isopropyl propionate in 2.5 M  $\text{Et}_3\text{N}$ /toluene at  $-78^\circ\text{C}$ . The curve depicts the unweighted least-squares fit to  $k_{\text{obsd}} = a[\text{LiHMDS}] + b$  ( $a = 1.9 \pm 0.4 \times 10^{-3}$ ,  $b = 1.50 \pm 0.09 \times 10^{-3}$ ).

**VIII.** Table of data for the plot in section **VII**.

| [LiHMDS] (M) | $k_{\text{obsd}1}$ ( $\text{s}^{-1}$ ) | $k_{\text{obsd}2}$ ( $\text{s}^{-1}$ ) | $k_{\text{obsd}}(\text{avg})$ ( $\text{s}^{-1}$ ) |
|--------------|----------------------------------------|----------------------------------------|---------------------------------------------------|
| 0.05         | $1.44 \pm 0.01\text{E-}3$              | $1.58 \pm 0.02\text{E-}3$              | $1.51 \pm 0.09\text{E-}3$                         |
| 0.10         | $1.82 \pm 0.02\text{E-}3$              | $1.65 \pm 0.01\text{E-}3$              | $1.7 \pm 0.1\text{E-}3$                           |
| 0.15         | $1.76 \pm 0.02\text{E-}3$              | $1.87 \pm 0.01\text{E-}3$              | $1.82 \pm 0.07\text{E-}3$                         |
| 0.20         | $2.20 \pm 0.02\text{E-}3$              | $1.98 \pm 0.02\text{E-}3$              | $2.0 \pm 0.1\text{E-}3$                           |
| 0.25         | $1.86 \pm 0.03\text{E-}3$              | $1.96 \pm 0.02\text{E-}3$              | $1.91 \pm 0.07\text{E-}3$                         |
| 0.40         | $2.19 \pm 0.03\text{E-}3$              | $2.35 \pm 0.03\text{E-}3$              | $2.2 \pm 0.1\text{E-}3$                           |

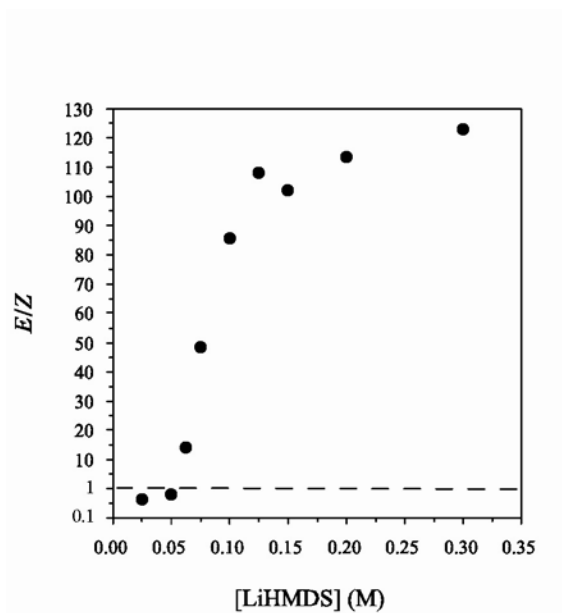

**IX.** Plot of *E/Z* selectivity for the enolization of **5** (0.05 M) by LiHMDS in 1.5 M Et<sub>3</sub>N/toluene at -78 °C.

**X.** Table of data for the plot in section **IX**.

| [LiHMDS] (M) | <i>E/Z</i> 1 | <i>E/Z</i> 2 | <i>E/Z</i> (avg) |
|--------------|--------------|--------------|------------------|
| 0.025        | 1 : 4.4      | 1 : 3.2      | 1 : 3.8          |
| 0.05         | 1 : 2.3      | 1 : 1.8      | 1 : 2.1          |
| 0.0625       | 11.4 : 1     | 16.7 : 1     | 14 : 1           |
| 0.075        | 49 : 1       | 48 : 1       | 49 : 1           |
| 0.1          | 88 : 1       | 83 : 1       | 86 : 1           |
| 0.125        | 110 : 1      | 106 : 1      | 108 : 1          |
| 0.15         | 106 : 1      | 98 : 1       | 102 : 1          |
| 0.2          | 107 : 1      | 120 : 1      | 114 : 1          |
| 0.3          | 138 : 1      | 108 : 1      | 123 : 1          |

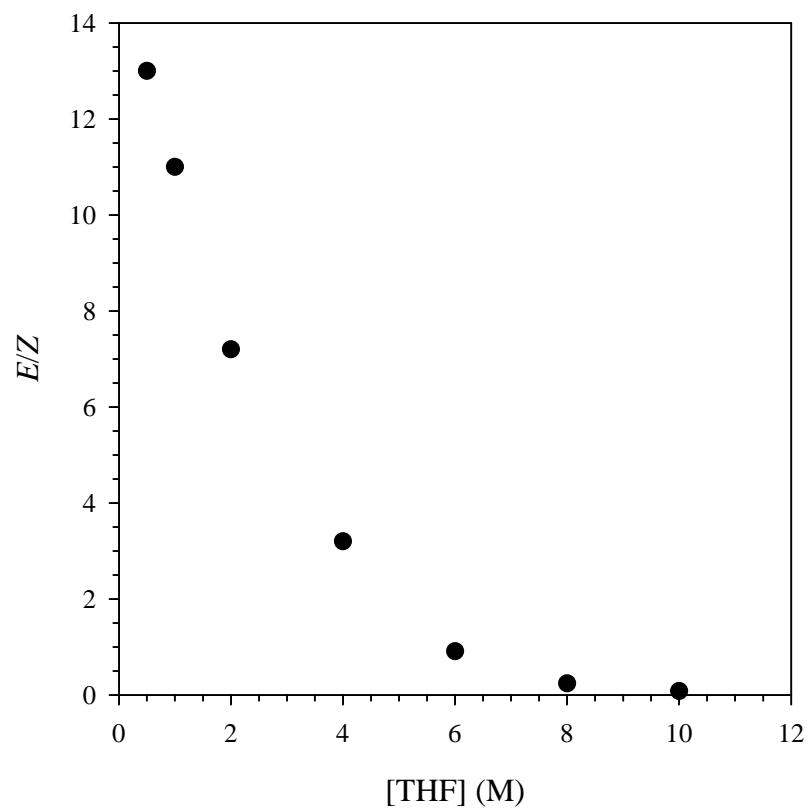

**XI.** Plot of *E/Z* selectivity vs. [THF] for the enolization of **5** (0.05 M) by LiHMDS (0.15 M) in toluene at -78 °C.

**XII.** Table of data for the plot in section **XI**.

| [THF] | <i>E/Z</i> |
|-------|------------|
| 0.5   | 13 : 1     |
| 1.0   | 11 : 1     |
| 2.0   | 7.2 : 1    |
| 4.0   | 3.2 : 1    |
| 6.0   | 1 : 1.1    |
| 8.0   | 1 : 4.2    |
| 10.0  | 1 : 13     |



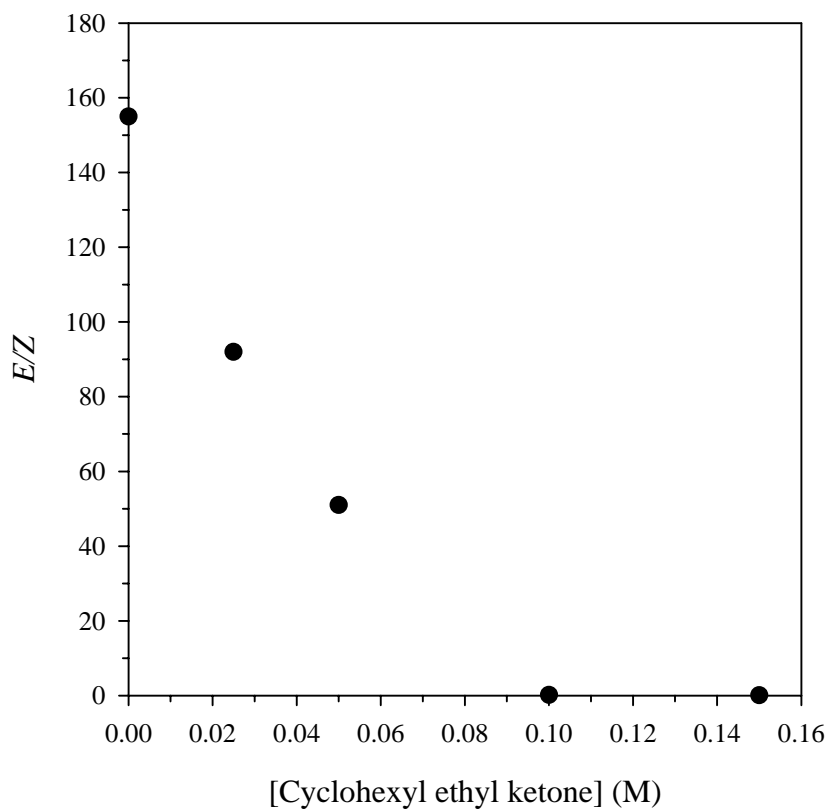

**XIII.** Plot of *E/Z* selectivity vs. [cyclohexyl ethyl ketone] for the enolization of **5** (0.05 M) by LiHMDS (0.15 M) in 1.5 M Et<sub>3</sub>N/toluene at -78 °C.

**XIV.** Data for the plot in section **XIII**.

| [Cyclohexyl ethyl ketone] (M) | <i>E/Z</i> of 2-methyl-3-pentanone |
|-------------------------------|------------------------------------|
| 0                             | 155 : 1                            |
| 0.025                         | 92 : 1                             |
| 0.05                          | 51 : 1                             |
| 0.10                          | 1 : 5                              |
| 0.15                          | 1 : 10                             |

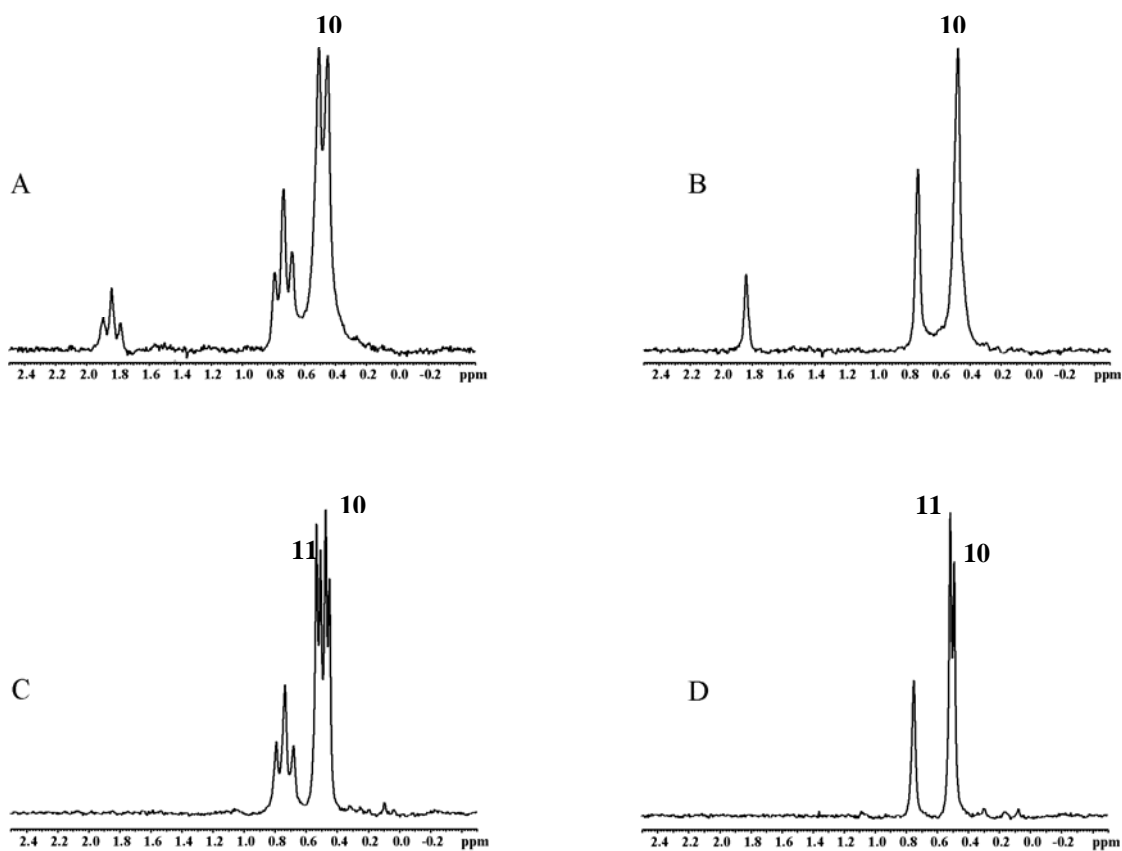

**XV.**  ${}^6\text{Li}$  spectra recorded on  $[\text{}^6\text{Li}, \text{}^{15}\text{N}]\text{LiHMDS}$  (0.15 M),  $\text{Et}_3\text{N}$  (1.5 M), and **5** (0.05 M) in toluene at  $-100\text{ }^\circ\text{C}$ . (A) Enolization takes place at  $-100\text{ }^\circ\text{C}$  showing *E* enolate mixed dimer **10**; (B) Spectrum (A) decoupled; (C) Enolization takes place at  $0\text{ }^\circ\text{C}$  showing *E* enolate mixed dimer **10** and *Z* enolate mixed dimer **11**; (D) Spectrum (C) decoupled.

**XVI.** *E/Z* selectivities for the enolization of **5** (0.05 M) by LiHMDS (0.15 M) in the presence of trialkyl amines at -78 °C in toluene.

| Amine                                         | <i>E/Z</i> |
|-----------------------------------------------|------------|
| Et <sub>3</sub> N <sup>a</sup>                | 102 : 1    |
| DMEA <sup>b</sup>                             | 90 : 1     |
| ( <i>i</i> -Pr) <sub>2</sub> EtN <sup>b</sup> | 40 : 1     |
| ( <i>i</i> -Bu) <sub>3</sub> N <sup>b</sup>   | 60 : 1     |

<sup>a</sup> 1.5M ligand. <sup>b</sup>1.0M ligand

**XVII.** *E/Z* selectivities for the enolization of **5** (0.05 M) by LiHMDS (0.15 M) in the presence of ethereal ligands at -78 °C in toluene.

| Ligand                          | <i>E/Z</i> |
|---------------------------------|------------|
| THF (0.5 M)                     | 13 : 1     |
| THF (10 M)                      | 1 : 13     |
| 2,2,5,5-tetramethyl THF (1.5 M) | 42 : 1     |
| cineole (1 M)                   | 38 : 1     |

**XVIII.** *E/Z* selectivities for the enolization of **5** (0.05 M) by LiHMDS (0.15 M) in the presence of polydentate ligands at -78 °C in toluene.

| Ligand                                                        | <i>E/Z</i> |
|---------------------------------------------------------------|------------|
| TMEDA                                                         | 33 : 1     |
| TMCDA                                                         | 26 : 1     |
| Me <sub>2</sub> NCH <sub>2</sub> CH <sub>2</sub> OMe (1.5 M)  | 3 : 1      |
| Me <sub>2</sub> NCH <sub>2</sub> CH <sub>2</sub> OMe (0.10 M) | 52 : 1     |

**XIX.** *E/Z* selectivity of methyl propionate at -78 °C.

| lithium amide | ligand            | <i>E/Z</i> |
|---------------|-------------------|------------|
| LDA           | THF               | 9 : 1      |
| LDA           | THF / HMPA        | 1 : 5      |
| LiHMDS        | THF               | 1 : 8      |
| LiHMDS        | Et <sub>3</sub> N | 22 : 1     |

**XX.** *E/Z* selectivities for the enolization of various ketones (0.05 M) by LiHMDS (0.15 M) in Et<sub>3</sub>N (1.5 M)/toluene at -78 °C. <sup>a</sup>60 °C

| ketone                  | <i>E/Z</i> |
|-------------------------|------------|
| 3-pentanone             | 142 : 1    |
| 2-methyl-3-pentanone    | 102 : 1    |
| cyclohexyl ethyl ketone | 79 : 1     |
| ethyl phenyl ketone     | 3.4 : 1    |

**XXI.** Stereoselectivities of aldol reaction of ketone enolates (0.05 M) generated by LiHMDS (0.15 M) in Et<sub>3</sub>N (1.5 M)/toluene at -78 °C with 0.15 M isobutyraldehyde.

| ketone                  | anti / syn |
|-------------------------|------------|
| 3-pentanone             | 8 : 1      |
| 2-methyl-3-pentanone    | 25 : 1     |
| cyclohexyl ethyl ketone | >30 : 1    |



**XXII.** Stereoselectivities of aldol reaction of 2-methyl-3-pentanone enolate (0.05 M) generated by LiHMDS (0.15 M) in various enolization and aldol solvent systems at -78 °C with 0.15 M isobutyraldehyde.

| enolization solvent               | aldol solvent                                 | anti / syn |
|-----------------------------------|-----------------------------------------------|------------|
| 1.5 M Et <sub>3</sub> N / toluene | 1.5 M Et <sub>3</sub> N / toluene             | 25 : 1     |
| 1.5 M Et <sub>3</sub> N / toluene | 1.5 M Et <sub>3</sub> N / 1.5 M THF / toluene | 18 : 1     |
| THF                               | THF                                           | 1 : 4      |

**XXIII.** Stereoselectivities of aldol reaction of 3-pentanone enolate (0.05 M) generated by LiHMDS (0.15 M) in 1.5 M Et<sub>3</sub>N/toluene and various aldol solvent systems at -78 °C with 0.15M isobutyraldehyde.

| aldol solvent (1.5 M)                               | anti / syn |
|-----------------------------------------------------|------------|
| HMPA                                                | 1 : 1.5    |
| 2,2,5,5-tetramethyl THF                             | 7 : 1      |
| MeOCH <sub>2</sub> CH <sub>2</sub> NMe <sub>2</sub> | 2.5 : 1    |
| sparteine                                           | 2.5 : 1    |
| TMEDA                                               | 4 : 1      |
